1 **Serendipitous detection of *Anopheles stephensi* in Kisumu, Kenya in June 2022**

2  
3 Bryson Alberto Ndenga, Sammy Wambua, Kevin Omondi Owuor, Rodney Omukuti, Salome  
4 Chemutai, Daniel Arabu, Irene Miringu, Carren Bosire, Kavinya Mwendwa, Christabel Achieng  
5 Winter, Francis Maluki Mutuku, Donal Bisanzio, Angelle Desiree LaBeaud, Keli Nicole Gerken

6  
7 Author affiliations: Kenya Medical Research Institute, Kisumu, Kenya (B.A. Ndenga, K.O.  
8 Owuor, C.A. Winter); Pwani University, Kilifi, Kenya; Research and Conservation Support  
9 Sciences, Kilifi, Kenya; and University of Glasgow, Glasgow, UK (S. Wambua); Pwani  
10 University, Kilifi, Kenya, and Research and Conservation Support Sciences, Kilifi, Kenya (R.  
11 Omukuti, S. Chemutai, D. Arabu, I. Miringu); Technical University of Mombasa, Mombasa,  
12 Kenya (C. Bosire, K. Mwendwa, F.M. Mutuku); RTI International, Washington, DC, USA (D.  
13 Bisanzio); Stanford University School of Medicine, Stanford, California, USA (A.D. LaBeaud,  
14 K.N. Gerken).

15  
16 **Abstract**

17 In June 2022, a pool of five mosquitoes that were morphologically classified as *Anopheles*  
18 *gambiae* and caught in Kisumu (Kenya) were tested for blood-meal analysis. Of the 19.6%  
19 (11/56) amplicon sequence variants assigned to mosquito species using basic local alignment  
20 search tool (BLAST), one had 15 hits matching *Anopheles stephensi*.

21 **Research letter**

22 *Anopheles stephensi* is a native urban malaria vector in south Asia and the Arabian  
23 Peninsula. It is capable of transmitting both *Plasmodium falciparum* and *P. vivax* and is

24 projected to expand further as urbanization increases, especially in Africa (1). It was first  
25 reported in Africa in Djibouti in 2012 (2) then in Ethiopia in 2019 (3), Sudan in 2018 (4),  
26 Somali-land in 2020 (5), Nigeria in 2020 (6) and for the first time in Marsabit County in northern  
27 Kenya in December 2022 (7). This demonstrates a clear and rapid expansion of its geographical  
28 range within the continent.

29         During a One Health study on livestock and vector dynamics at urban slaughterhouses,  
30 we carried out mosquito collections using ovitraps, larval/pupae sampling, Prokopack aspirator  
31 and Biogents (BG)-trap baited with CO<sub>2</sub>. This study was titled “Urban Rift Valley Fever Virus as  
32 a New Ecological Niche: Continuous Introduction from Animal Products” and performed at the  
33 Mamboleo Slaughterhouse (0° 3' 25.4" N, 34° 47' 10.9" E, Figure) in Kisumu City, Kenya, and  
34 was approved by Stanford University (61386), Kenya Medical Research Institute Scientific and  
35 Ethics Review Unit (KEMRI/SERU/CGHR/03-07-390/4293) and obtained research license from  
36 the National Commission for Science, Technology & Innovation (NACOSTI/P/21/13557).

37         Adult mosquitoes resting indoors and outdoors were sampled using a Prokopack aspirator  
38 from May 16<sup>th</sup> 2022 to July 1<sup>st</sup> 2022. Sampling lasted one hour and was conducted between  
39 08:45 HRS and 01:30 HRS. Subsequent samplings were completed biweekly. Collected  
40 mosquitoes were killed using a pyrethrum aerosol spray before morphological identification in a  
41 field station and recorded on a data form. Female mosquitoes were further sorted according to  
42 their blood-feeding stages as unfed, blood-fed, half-gravid or gravid. Mosquitoes were preserved  
43 in silica gel self-indicating 6-20mesh (Blue) - 500gm (Loba Chemie Pvt. Ltd, Jehangir Villa,  
44 107, Wodehouse Road, Colaba, Mumbai 400 005, India) with the intention for further blood  
45 meal testing.

46 A total of 2,891 mosquitoes were collected: 66.2% (1,782) indoors and 33.8% (765)  
47 outdoors; 50.7% (1,465) males and 49.3% (1,426) females. Species identified morphologically  
48 were: 0.3% (9) *Aedes aegypti*; 6.3% (182) *Anopheles coustani*; 0.3% (8) *An. funestus*; 10.9%  
49 (315) *An. gambiae*, and 82.2% (2,377) *Culex* spp. Over a half, 61.6% (194/315), of the *An.*  
50 *gambiae* were collected outdoors and 38.4% (121) indoors; 46.3% (146) were males; 19.0% (60)  
51 un-blood-fed; 25.1% (79) blood-fed; 6.0% (19) half-gravid and 3.5% (11) gravid. A sample of  
52 the blood-fed mosquitoes were transported on dry ice to Pwani University Biosciences Research  
53 Centre (PUBReC) in Kilifi, Kenya, for determination of blood meal sources.

54 Genomic DNA was extracted from the mosquito abdomens using the TIANamp Genomic  
55 DNA Kit (Tiangen, Beijing, China). Quality and quantity of DNA was analyzed by NanoDrop  
56 2000C spectrophotometer (Thermo Scientific Inc, USA) and verified on 1% agarose gel  
57 electrophoresis. To identify blood meal sources, we PCR-amplified ~300 base pair (bp) of the  
58 cytochrome b barcode (8) which was high-throughput-sequenced, at Macrogen Inc., Seoul  
59 Korea, using the Illumina 300 × 2 bp platform (Illumina, USA). The amplicon sequence data  
60 were analyzed with the DADA2 (version 1.21.0) bioinformatics pipeline (Callahan et al., 2016)  
61 implemented in the R programming language (version 4.1.1). After quality preprocessing, high  
62 quality reads were denoised and clustered into unique sequences i.e., amplicon sequence variants  
63 (ASVs). We assigned taxonomy to the ASVs using two approaches. We assigned taxonomy,  
64 first, by exact ASV matching against DADA2-trained MIDORI2 reference database (version  
65 GB254) which includes eukaryotic mitochondrial sequences (9). ASVs that were not assigned by  
66 this approach were compared against the NCBI database using BLAST (10). Raw sequences are  
67 available in SRA database of NCBI under project accession number PRJNA966766.

68 In all, 248 ASVs were inferred, 192 of which were classified to 14 vertebrate species  
69 (Mammalia and Aves) by exact matching against MIDORI2 reference database. Other than  
70 vertebrates, 19.6% (11/56) of the ASVs assigned using BLAST matched to mosquito species one  
71 of which was *An. stephensi* with a total of 15 hits (89-93% identity, 67-85% coverage, E-value <  
72 1e-46 (Table). The reads matching *An. stephensi* were tracked to a pool of five (5) mosquitoes  
73 that had been morphologically classified as *An. gambiae* in the field. These mosquitoes were  
74 collected from Mamboleo Slaughterhouse in Kisumu City, Kenya in June 2022.

75 Our findings report the first detection of *An. stephensi* south of the Equator. Furthermore,  
76 this detection represents the presence of an invasive vector in an urban area that is malaria  
77 endemic. Our study suggests that the detections of *An. stephensi* within Africa (1-5, 7) could be  
78 dramatically underreported. The initial false identification of this vector also indicates that to  
79 fully capture this vector's boundary, molecular methods and confirmatory testing may be  
80 required. The presence of a malaria vector adapted to breeding in open water containers  
81 prevalent in urban areas is particularly concerning. *Anopheles stephensi* can effectively transmit  
82 *P. falciparum* and *P. vivax* and entry into malaria endemic zones could shift malaria transmission  
83 dynamics considerably.

84

## 85 **Acknowledgements**

86 We thank Charles Otieno Adipo for sampling the vectors, the management of Mamboleo  
87 Slaughterhouse for allowing us to sample mosquitoes in the premises and our colleagues in  
88 KEMRI and Stanford University for their support to approve this research study. This study was  
89 funded by the Stanford University Center for Innovations in Global Health Seed Grant 2021 and

90 the Robert E Shope ASTMH (American Society of Tropical Medicine and Hygiene) to Dr. Keli  
91 Nicole Gerken.

92

### 93 **About the Author**

94 Bryson Alberto Ndenga, PhD is a Senior Research Scientist in Kenya Medical Research  
95 Institute, Centre for Global Health Research. His primary interest is in the biology, ecology and  
96 control of mosquitoes that transmit malaria, dengue, chikungunya and Rift Valley fever.

97

### 98 **Financial interest**

99 The authors declare that they have no financial interests.

100

### 101 **Conflicts of interest**

102 The authors declare that they have no conflicts of interests.

103

### 104 **References**

- 105 1. Sinka M, Pironon S, Massey N, Longbottom J, Hemingway J, Moyes C, et al. A new  
106 malaria vector in Africa: Predicting the expansion range of *Anopheles stephensi* and  
107 identifying the urban populations at risk. PNAS. 2020;117.
- 108 2. Faulde M, Rueda L, Khaireh B. First record of the Asian malaria vector *Anopheles*  
109 *stephensi* and its possible role in the resurgence of malaria in Djibouti, Horn of Africa.  
110 Acta Trop. 2014;139:39-43.

- 111 3. Tadesse F, Ashine T, Teka H, Esayas E, Messenger L, Chali W, et al. *Anopheles*  
112 *stephensi* mosquitoes as vectors of *Plasmodium vivax* and *P. falciparum*, horn of Africa,  
113 2019. Emerg Infect Dis. 2021;27.
- 114 4. Ahmed A, Khogali R, Elnour M, Nakao R, Salim B. Emergence of the invasive malaria  
115 vector *Anopheles stephensi* in Khartoum State, Central Sudan. Parasit Vectors. 2021;14.
- 116 5. Ali S, Samake J, Spear J, Carter T. Morphological identification and genetic  
117 characterization of *Anopheles stephensi* in Somaliland. Parasit Vectors. 2022;15.
- 118 6. World Health Organization initiative to stop the spread of *Anopheles stephensi* in Africa.  
119 Geneva: WHO; 2022.
- 120 7. Ochomo E, Milanoi S, Abong'o B, Onyango B, Muchoki M, Omoke D, et al. Molecular  
121 surveillance leads to the first detection of *Anopheles stephensi* in Kenya. Res Square. In  
122 press 2023.
- 123 8. Hadj-Henni L, De-Meulemeester T, Depaquit J, Noël P, Germain A, Helder R, et al.  
124 Comparison of vertebrate cytochrome b and prepronociceptin for blood meal analyses in  
125 Culicoides. Front Vet Sci. 2015;2.
- 126 9. Leray M, Knowlton N, Machida R. MIDORI2: A collection of quality controlled,  
127 preformatted, and regularly updated reference databases for taxonomic assignment of  
128 eukaryotic mitochondrial sequences. Environ DNA. 2022;4:894–907.
- 129 10. Altschul S, Gish W, Miller W, Myers E, Lipman D. Basic local alignment search tool. J  
130 Mol Bio. 1990;215:403–410.

131

132 Address for correspondence: Dr. Bryson Alberto Ndenga, Kenya Medical Research Institute,  
 133 Centre for Global Health Research, P.O. Box 1578 Code 40100 Kisumu City, Kenya, email:  
 134 [bndenga@yahoo.com](mailto:bndenga@yahoo.com), phone number: +254 722 932 350.

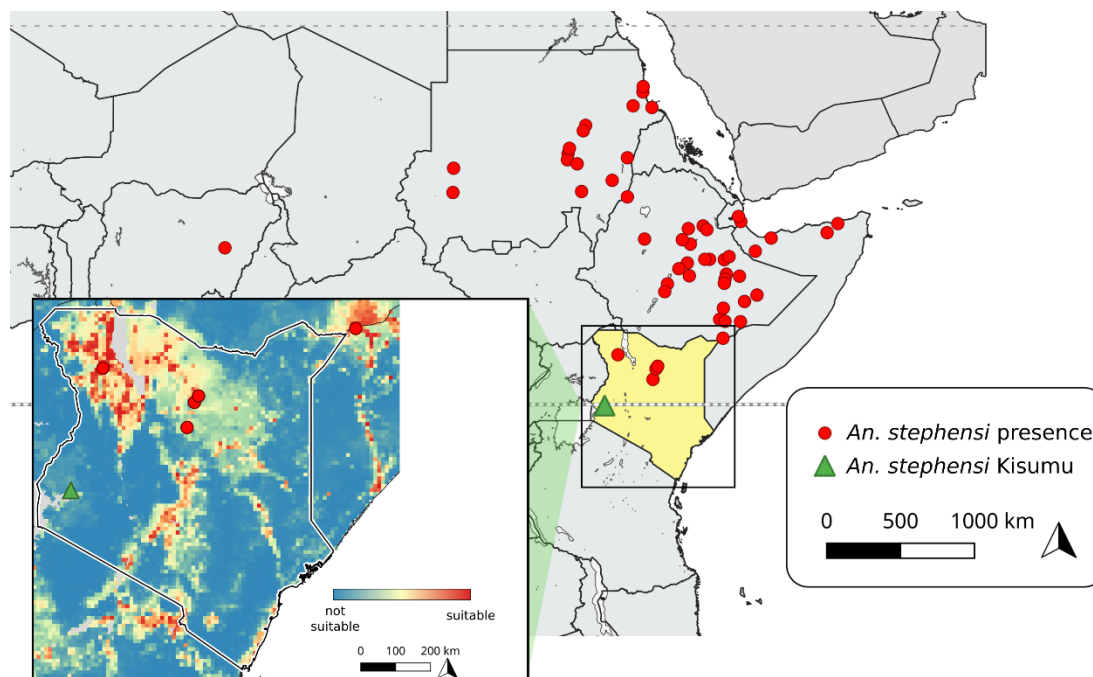

135  
 136 **Figure 1.** Map showing the location in Kisumu, Kenya where *Anopheles stephensi* (green  
 137 triangle) was collected in June 2022 and other sites in Africa where it has been reported (Source:  
 138 *Anopheles stephensi* reports (red points): <https://apps.who.int/malaria/maps/threats/>). Suitability  
 139 map created using data obtained from Sinka et al. 2020<sup>1</sup>.

140  
 141 **Table 1.** Summary of coverage and identity values for each of the top ten (10) hits in the BLAST  
 142 search matching *Anopheles stephensi*.

143

| Description                                            | Maximum score | Query coverage | E value  | Identity | Accession  |
|--------------------------------------------------------|---------------|----------------|----------|----------|------------|
| <i>Anopheles stephensi</i> strain Indian chromosome 2L | 326           | 84%            | 2.00E-84 | 92.51%   | CP032300.1 |

|                                                          |     |     |          |        |            |
|----------------------------------------------------------|-----|-----|----------|--------|------------|
| <i>Anopheles stephensi</i> strain Indian chromosome 3L   | 320 | 85% | 8.00E-83 | 92.07% | CP032302.1 |
| <i>Anopheles stephensi</i> strain Indian chromosome 3R   | 320 | 82% | 8.00E-83 | 92.07% | CP032301.1 |
| <i>Anopheles stephensi</i> strain Indian chromosome 2R   | 315 | 81% | 4.00E-81 | 91.63% | CP032299.1 |
| <i>Anopheles stephensi</i> strain SDA-500 chromosome 3R  | 315 | 83% | 4.00E-81 | 91.63% | CP032234.1 |
| <i>Anopheles stephensi</i> strain SDA-500 chromosome 2R  | 309 | 81% | 2.00E-79 | 91.19% | CP032232.1 |
| <i>Anopheles stephensi</i> strain SDA-500 chromosome 2L  | 303 | 84% | 9.00E-78 | 90.75% | CP032233.1 |
| <i>Anopheles stephensi</i> strain SDA-500 chromosome 3L  | 298 | 88% | 4.00E-76 | 90.31% | CP032235.1 |
| <i>Anopheles ziemanni</i> genome assembly, chromosome: 2 | 291 | 83% | 7.00E-74 | 89.52% | OX030919.2 |

144

145
